# Supplementary material for: The Association between Sleep Patterns, Educational Identity, and School Performance in Adolescents
Source: MDPI journal article supplement (doi:10.3390/brainsci13020178), 2023-01-20
Supplement: s1 [file s1]

Table S1. Sleep characteristics of the four groups. Means (M) and standard deviations (SD) are shown.

| Sleep variables                                  | Social Jetlag < 90 minutes; Catch-up sleep < 60 minutes<br><i>M (SD)</i> | Social jetlag < 90 minutes; Catch-up sleep ≥ 60 minutes<br><i>M (SD)</i> | Social jetlag ≥ 90 minutes; Catch-up sleep < 60 minutes<br><i>M (SD)</i> | Social jetlag ≥ 90 minutes; Catch-up sleep ≥ 60 minutes<br><i>M (SD)</i> |
|--------------------------------------------------|--------------------------------------------------------------------------|--------------------------------------------------------------------------|--------------------------------------------------------------------------|--------------------------------------------------------------------------|
| Amount of social jetlag (In minutes)             | 42.58 (33.61)                                                            | 52.30 (29.68)                                                            | 151.72 (52.39)                                                           | 145.21 (48.04)                                                           |
| Amount of catch-up sleep (In minutes)            | -3.55 (50.19)                                                            | 123.75 (64.26)                                                           | -17.10 (72.66)                                                           | 141.20 (60.16)                                                           |
| Total sleep time during the week (In minutes)    | 419.60 (44.31)                                                           | 396.43 (55.28)                                                           | 415.27 (44.06)                                                           | 391.17 (47.60)                                                           |
| Total sleep time during the weekend (In minutes) | 416.05 (64.15)                                                           | 520.18 (66.04)                                                           | 398.17 (80.42)                                                           | 532.54 (57.55)                                                           |
